# Supplementary material
Source: PubMed Central journal article supplement (PMC3245860)
Supplement: NIHMS37134-supplement-1.pdf [file NIHMS37134-supplement-1.pdf]

## **SUPPLEMENTARY INFORMATION**

### **Differential control of presynaptic efficacy by postsynaptic N-cadherin and $\beta$ -catenin**

Nathalia Vitureira, Mathieu Letellier, Ian J. White, Yukiko Goda

**Supplementary Figures 1 - 6**

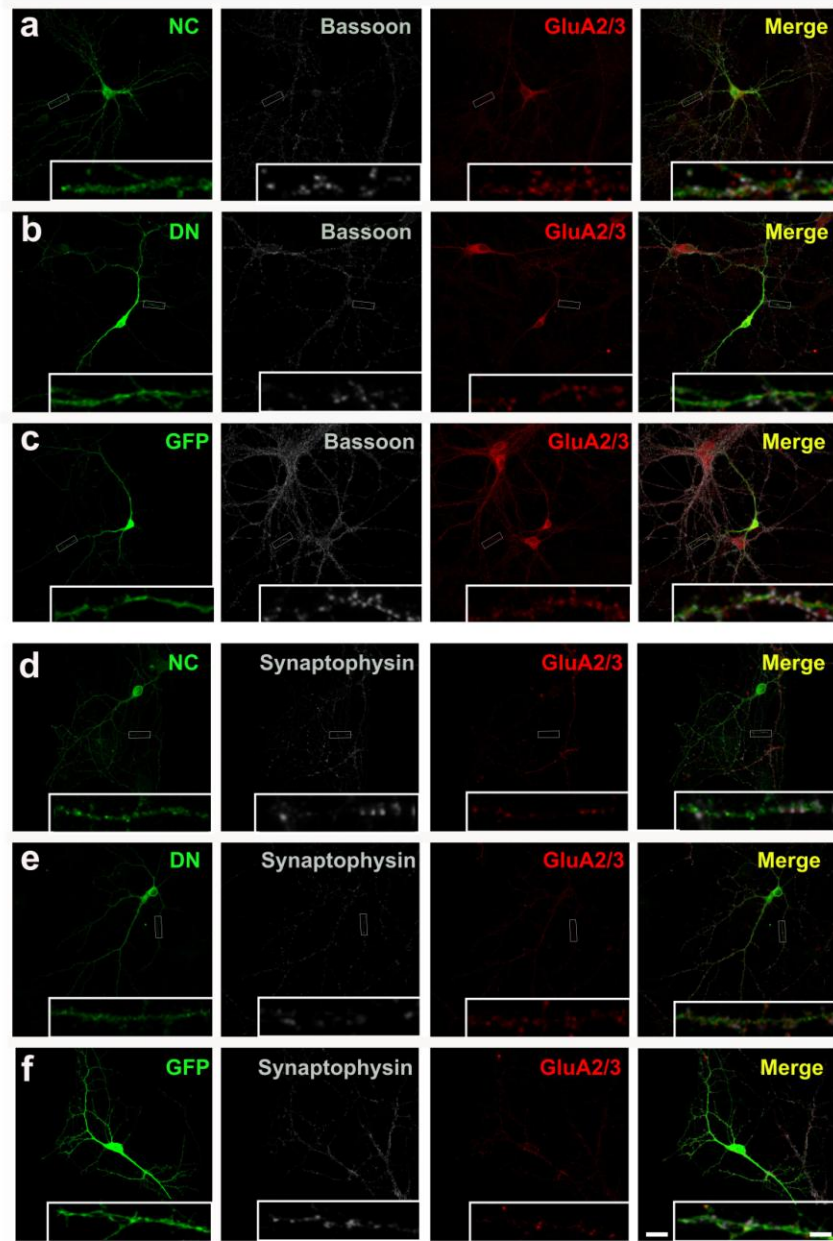

**Supplementary Figure 1. Postsynaptic expression of DN-NCad reduces expression of presynaptic proteins.** Representative images of hippocampal neurons transfected with WT-NCad (**a, d**), DN-NCad (**b, e**) and GFP (**c, f**) and double labeled for bassoon or synaptophysin and GluA2/3. Scale bars, 20  $\mu\text{m}$ ; inset 6  $\mu\text{m}$ .

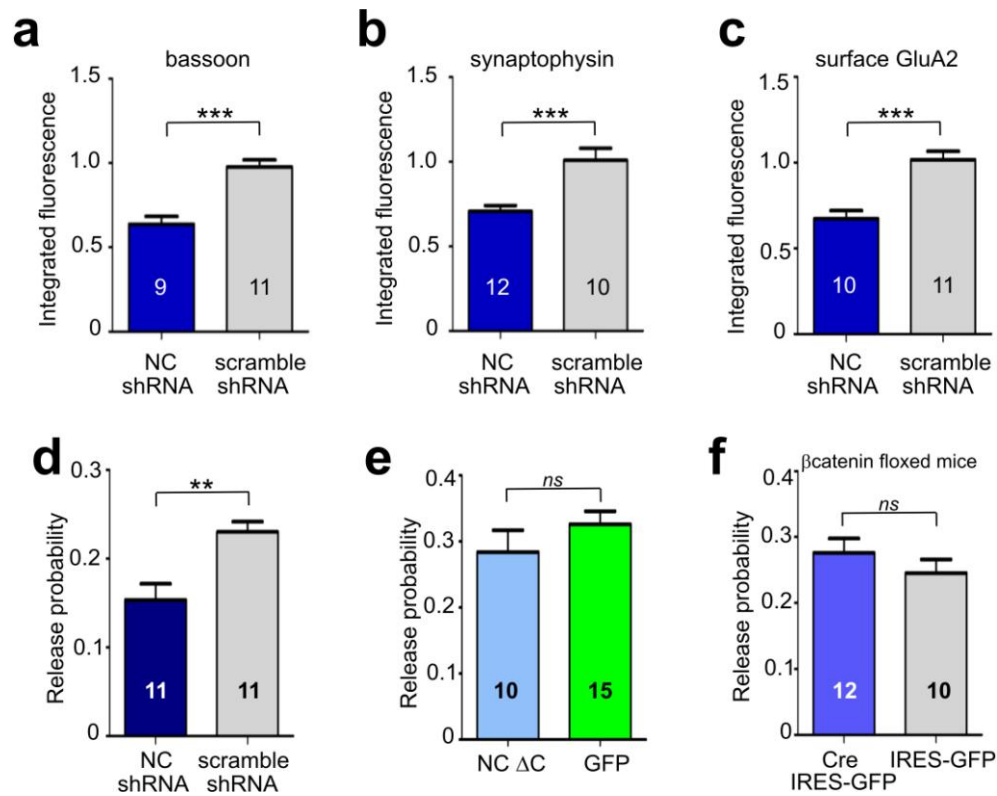

**Supplementary Figure 2. Postsynaptic N-cadherin knock-down decreases the levels of presynaptic proteins and surface GluA2.** **a-c**, Summary of integrated immunofluorescence puncta intensity in cells postsynaptically expressing NC shRNA and control scramble. Synaptic puncta were identified by double labeling for bassoon or synaptophysin and GluA2/3, or for synapsin and surface GluA2. Bars show mean  $\pm$  SEM for each group relative to untransfected neighboring neurons in the same field of view. **d-f**, Summary of  $p_r$  at synapses formed onto dendrites expressing a N-cadherin shRNA or control scrambled shRNA (**d**), a mutant N-cadherin construct (NC- $\Delta$ C) or GFP (**e**), and in  $\beta$ -catenin floxed hippocampal neurons transfected with Cre-IRES-GFP to knock down  $\beta$ -catenin or control IRES-GFP (**f**). Bars show mean  $\pm$  SEM. The number of neurons used is shown in bars; ns denotes no statistically significant difference, \*\* $P < 0.01$ , \*\*\* $P < 0.001$ ; two tailed student's  $t$ -test.

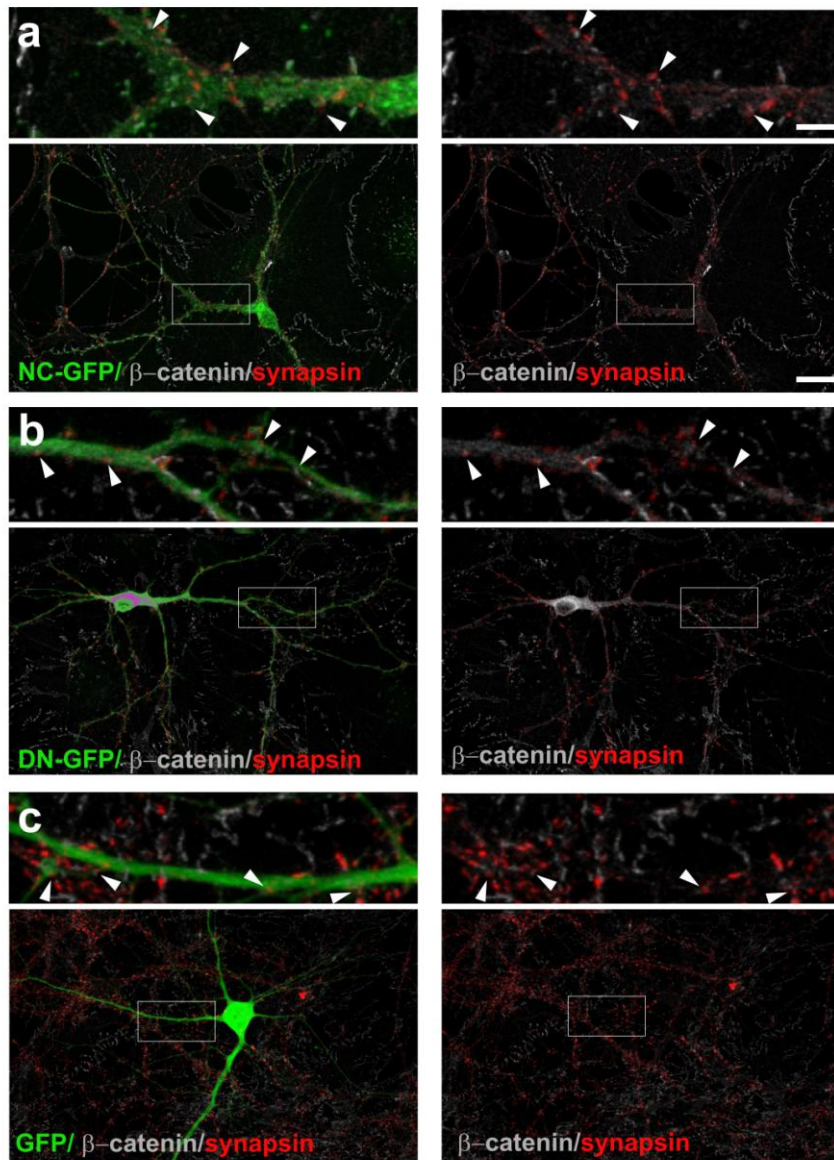

**Supplementary Figure 3. Localization of  $\beta$ -catenin in neurons expressing WT-NCad, DN-NCad or control GFP.** Hippocampal neurons postsynaptically expressing WT-NCad (a), DN-NCad (b) or GFP alone (c) show a similar distribution of  $\beta$ -catenin. Cultures were double labeled for  $\beta$ -catenin and synapsin. Arrowheads show synaptic  $\beta$ -catenin apposed to synapsin. Scale bar: 50  $\mu$ m; inset 5  $\mu$ m.

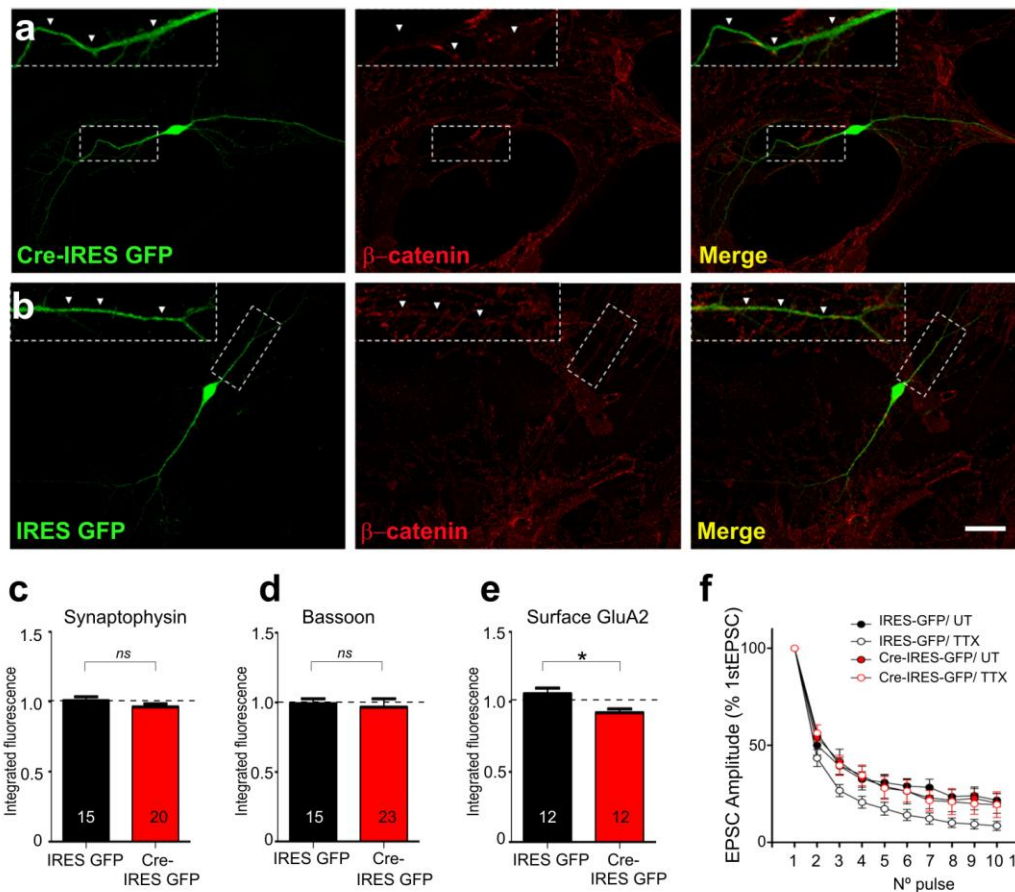

**Supplementary Figure 4. Postsynaptic  $\beta$ -catenin knock-down prevents the adjustment of  $p_r$  after activity block.** **a, b**, Neurons from  $\beta$ -catenin floxed mice expressing Cre-IRES-GFP show reduced levels of  $\beta$ -catenin compared to control cells. **c-d**, Summary of puncta intensity of indicated pre- and postsynaptic proteins. Bars show mean  $\pm$  SEM relative to non-transfected neighboring neurons in the same field of view. The number of neurons used is shown in bars; \* $P < 0.05$ ; ns, no statistically significant difference; two tailed student's  $t$ -test. Scale bar, 50  $\mu$ m. **f**, Averaged EPSC amplitudes of neurons expressing Cre-IRES GFP treated with (n= 8 cell pairs) or without TTX (n=9 cell pairs) or control IRES GFP treated with (n=9 cell pairs) or without TTX (n=8 cell pairs). Two tailed student's  $t$ -test,  $P > 0.05$ .

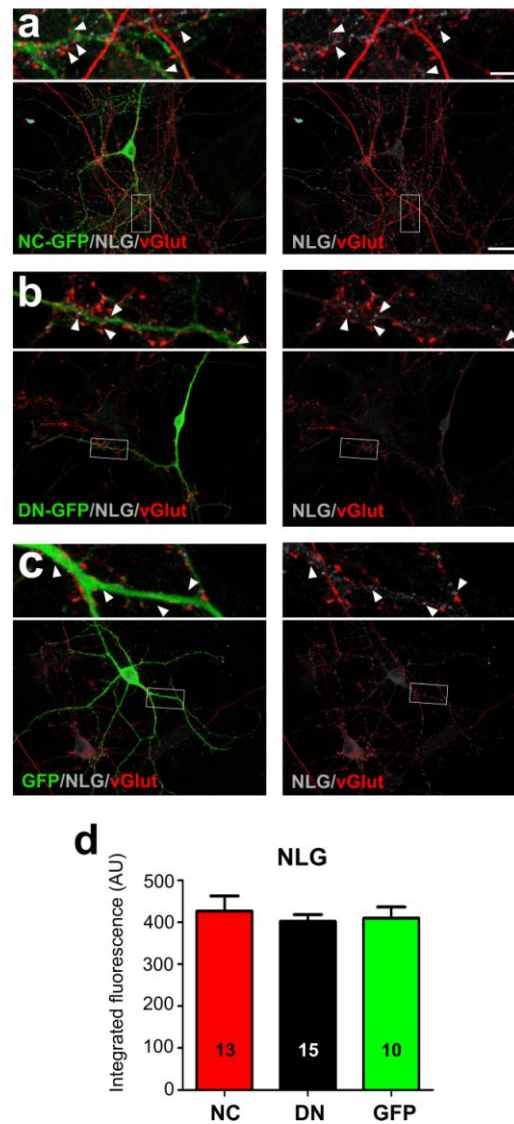

**Supplementary Figure 5. Disruption of postsynaptic N-cadherin does not affect the levels of neuroligin at excitatory synapses.** **a-c**, Hippocampal synapses postsynaptically expressing WT-NCad (a), DN-Ncad (b) or GFP alone (c) show a similar level of synaptic neuroligin (NLG) immunofluorescence signal. Excitatory synapses are identified by double labeling for vGlut1 (arrowheads). **d**, Summary of NLG associated integrated fluorescence intensity. Bars show mean  $\pm$  SEM for each group. The number of neurons is indicated in bars. Scale bar: 50  $\mu$ m; inset 6  $\mu$ m.

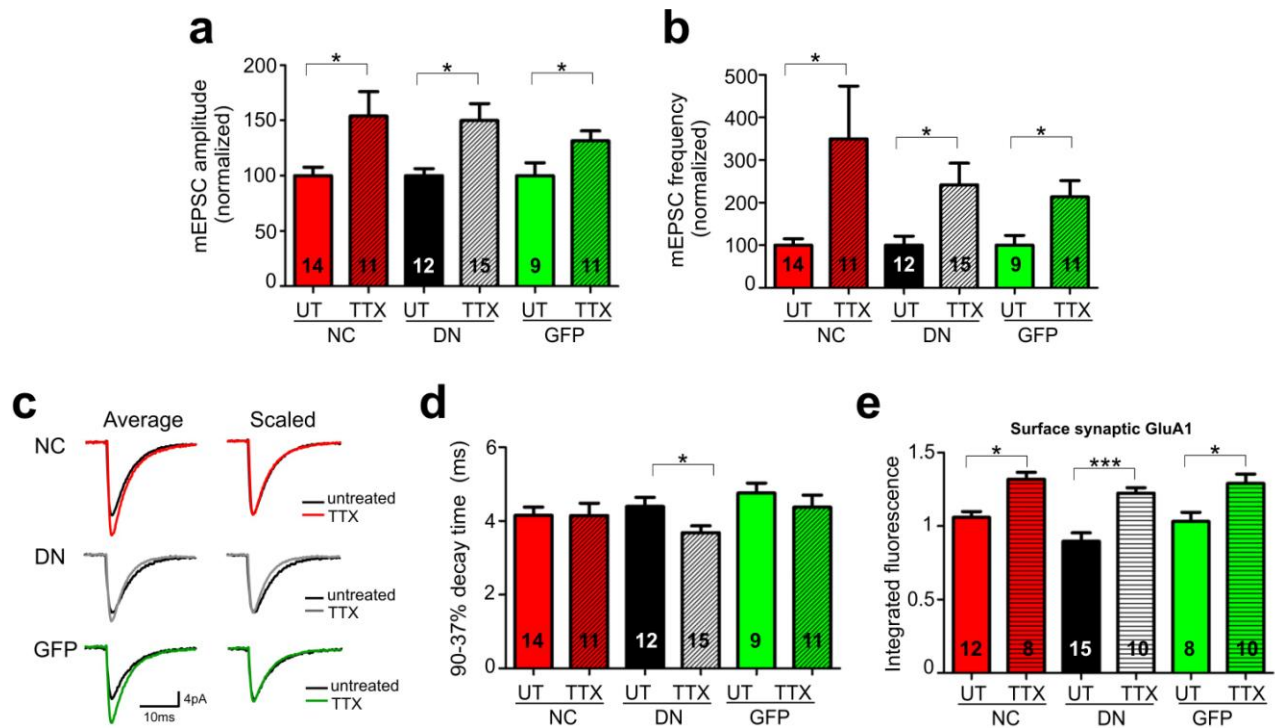

**Supplementary Figure 6. Disruption of postsynaptic N-cadherin activity alters the subunit composition of AMPARs.** **a-b**, Summary of the effect of chronic activity block with TTX (1  $\mu$ M, 36 h) on mEPSC amplitude (**a**) and frequency (**b**) corresponding to Figure 7b, c, showing the data normalized to untreated control. **c**, Effect of TTX treatment on mEPSC waveform of synapses expressing WT-NCad, DN-NCad or control GFP. Representative averaged traces of mEPSCs illustrate a faster decay following TTX treatment in DN-NCad neurons (**c<sub>i</sub>**). Summary of mean mEPSC decay times (**c<sub>ii</sub>**); two tailed student's *t*-test,  $P^* < 0.05$ . **d**, Summary of integrated puncta intensity of surface synaptic GluA1 labeling in cells postsynaptically expressing WT-NCad, DN-NCad or GFP. Synaptic GluA1 was identified by double labeling for synapsin. Bars show mean  $\pm$  SEM relative to control neighboring untransfected neurons without TTX treatments. The number of neurons used is shown in bars;  $P^* < 0.05$ ,  $P^{***} < 0.001$ . One way ANOVA followed by Tukey's test.
